# Supplementary material for: Central Nervous System Metabolism in Autism, Epilepsy and Developmental Delays: A Cerebrospinal Fluid Analysis
Source: MDPI journal article supplement (doi:10.3390/metabo12050371), 2022-04-20
Supplement: s1 [file s1]

Supplementary Table S2. Metabolite-Metabolite Pathway Analysis for ASD, Epilepsy and Developmental Delay Clinical Groups

**ASD Pathway Analysis**

| Pathway                                             | Total | Expected | Hits | P.Value  | Topology | PVal.Z | Topo.Z   | General Pathway Category            |
|-----------------------------------------------------|-------|----------|------|----------|----------|--------|----------|-------------------------------------|
| Purine metabolism                                   | 65    | 7.75     | 27   | 5.08E-10 | 1.55     | 3.9    | 1.91     | Nucleotide                          |
| Aminoacyl-tRNA biosynthesis                         | 48    | 5.73     | 21   | 1.70E-08 | 0.489    | 3.15   | -0.043   | Amino Acid                          |
| Pyrimidine metabolism                               | 39    | 4.65     | 18   | 7.06E-08 | 1.79     | 2.84   | 2.36     | Nucleotide                          |
| Glutathione metabolism                              | 28    | 3.34     | 14   | 6.53E-07 | 1.7      | 2.37   | 2.2      | Redox Metabolism                    |
| Glyoxylate and dicarboxylate metabolism             | 32    | 3.82     | 15   | 7.37E-07 | 0.742    | 2.34   | 0.423    | Energy Metabolism                   |
| Cysteine and methionine metabolism                  | 33    | 3.94     | 15   | 1.21E-06 | 1.16     | 2.23   | 1.19     | Redox Metabolism                    |
| Pantothenate and CoA biosynthesis                   | 19    | 2.27     | 10   | 1.63E-05 | 1.06     | 1.68   | 1        | Energy Metabolism                   |
| Phenylalanine metabolism                            | 10    | 1.19     | 7    | 2.71E-05 | 1.67     | 1.57   | 2.13     | Amino Acid, Neurotransmitter        |
| Valine, leucine and isoleucine biosynthesis         | 8     | 0.954    | 6    | 6.09E-05 | 0.857    | 1.4    | 0.636    | Amino Acid, Energy Metabolism       |
| Glycine, serine and threonine metabolism            | 33    | 3.94     | 12   | 0.000215 | 1.12     | 1.13   | 1.13     | Amino Acid, Neurotransmitter        |
| Glycolysis or Gluconeogenesis                       | 26    | 3.1      | 10   | 0.000438 | 1        | 0.974  | 0.9      | Energy Metabolism                   |
| Pentose phosphate pathway                           | 22    | 2.62     | 9    | 0.000502 | 1.24     | 0.945  | 1.34     | Energy Metabolism                   |
| Arginine biosynthesis                               | 14    | 1.67     | 7    | 0.000508 | 1.38     | 0.942  | 1.61     | Amino Acid                          |
| Butanoate metabolism                                | 15    | 1.79     | 7    | 0.000857 | 0.929    | 0.83   | 0.768    | Energy Metabolism                   |
|                                                     |       |          |      |          |          |        |          | Amino Acid, Energy Metabolism       |
| Alanine, aspartate and glutamate metabolism         | 28    | 3.34     | 10   | 0.000872 | 1.07     | 0.826  | 1.04     | Redox, Neurotransmitter             |
| beta-Alanine metabolism                             | 21    | 2.5      | 8    | 0.00181  | 0.95     | 0.67   | 0.808    | Energy Metabolism                   |
| Tryptophan metabolism                               | 41    | 4.89     | 12   | 0.002    | 0.75     | 0.649  | 0.438    | Neurotransmitter, Amino Acid        |
| D-Glutamine and D-glutamate metabolism              | 6     | 0.716    | 4    | 0.00242  | 1.2      | 0.608  | 1.27     | Amino Acid                          |
| Propanoate metabolism                               | 23    | 2.74     | 8    | 0.00354  | 0.818    | 0.527  | 0.564    | Energy Metabolism                   |
| Phenylalanine, tyrosine and tryptophan biosynthesis | 4     | 0.477    | 3    | 0.0061   | 2.33     | 0.41   | 3.36     | Neurotransmitter, Amino Acid        |
| Citrate cycle (TCA cycle)                           | 20    | 2.39     | 7    | 0.00611  | 0.895    | 0.41   | 0.706    | Energy Metabolism                   |
| Taurine and hypotaurine metabolism                  | 8     | 0.954    | 4    | 0.00931  | 1        | 0.32   | 0.9      | Redox Metabolism, Energy Metabolism |
| Valine, leucine and isoleucine degradation          | 40    | 4.77     | 10   | 0.0155   | 0.513    | 0.211  | 0.000332 | Amino Acid, Energy Metabolism       |
| Nitrogen metabolism                                 | 6     | 0.716    | 3    | 0.0254   | 0.6      | 0.105  | 0.161    | Amino Acid                          |
| Arginine and proline metabolism                     | 38    | 4.53     | 9    | 0.03     | 0.784    | 0.0701 | 0.501    | Amino Acid                          |
| Histidine metabolism                                | 16    | 1.91     | 5    | 0.0332   | 0.667    | 0.0479 | 0.284    | Amino Acid                          |
| Glycerolipid metabolism                             | 16    | 1.91     | 5    | 0.0332   | 0.6      | 0.0479 | 0.161    | Energy Metabolism                   |
| Pyruvate metabolism                                 | 22    | 2.62     | 6    | 0.0385   | 0.714    | 0.0165 | 0.372    | Energy Metabolism                   |

# Epileptic Pathway Analysis

| Pathway                                             | Total | Expected | Hits | P.Value  | Topology | PVal.Z  | Topo.Z   | General Pathway Category      |
|-----------------------------------------------------|-------|----------|------|----------|----------|---------|----------|-------------------------------|
| Pyrimidine metabolism                               | 39    | 9.5      | 32   | 2.30E-14 | 2.82     | 4.66    | 2.36     | Nucleotide, One-Carbon        |
| Purine metabolism                                   | 65    | 15.8     | 42   | 2.27E-12 | 2.12     | 3.89    | 1.52     | Nucleotide, One-Carbon        |
| Glycine, serine and threonine metabolism            | 33    | 8.04     | 25   | 4.70E-10 | 1.84     | 2.99    | 1.18     | Amino Acid, Neurotransmitter  |
| Glyoxylate and dicarboxylate metabolism             | 32    | 7.8      | 22   | 1.05E-07 | 1.29     | 2.08    | 0.511    | Energy Metabolism             |
|                                                     |       |          |      |          |          |         |          | Amino Acid, Energy Metabolism |
| Alanine, aspartate and glutamate metabolism         | 28    | 6.82     | 20   | 1.54E-07 | 1.81     | 2.02    | 1.15     | Redox, Neurotransmitter       |
| beta-Alanine metabolism                             | 21    | 5.12     | 16   | 7.05E-07 | 1.6      | 1.76    | 0.887    | Energy Metabolism             |
| Arginine biosynthesis                               | 14    | 3.41     | 12   | 2.13E-06 | 2.08     | 1.58    | 1.47     | Amino Acid                    |
| One carbon pool by folate                           | 9     | 2.19     | 9    | 2.82E-06 | 4.5      | 1.53    | 4.41     | Vitamin, One-Carbon           |
| Steroid biosynthesis                                | 42    | 10.2     | 23   | 1.75E-05 | 1.07     | 1.22    | 0.247    | Lipid Metabolism              |
| Pentose phosphate pathway                           | 22    | 5.36     | 14   | 9.45E-05 | 1.57     | 0.939   | 0.852    | Energy Metabolism             |
| Propanoate metabolism                               | 23    | 5.61     | 14   | 0.000189 | 1.36     | 0.823   | 0.6      | Energy Metabolism             |
| Phenylalanine metabolism                            | 10    | 2.44     | 8    | 0.000328 | 1.44     | 0.73    | 0.698    | Amino Acid, Neurotransmitter  |
| Butanoate metabolism                                | 15    | 3.66     | 10   | 0.000599 | 1.5      | 0.629   | 0.765    | Energy Metabolism             |
| Aminoacyl-tRNA biosynthesis                         | 48    | 11.7     | 22   | 0.000796 | 0.532    | 0.581   | -0.409   | Amino Acid                    |
| Pantothenate and CoA biosynthesis                   | 19    | 4.63     | 11   | 0.00172  | 1        | 0.452   | 0.159    | Vitamin, Energy Metabolism    |
| Glutathione metabolism                              | 28    | 6.82     | 14   | 0.00269  | 1.59     | 0.376   | 0.878    | Redox                         |
| Citrate cycle (TCA cycle)                           | 20    | 4.87     | 11   | 0.00299  | 1.42     | 0.358   | 0.67     | Energy Metabolism             |
| Valine, leucine and isoleucine biosynthesis         | 8     | 1.95     | 6    | 0.00359  | 0.857    | 0.328   | -0.0147  | Amino Acid, Energy Metabolism |
| Pentose and glucuronate interconversions            | 18    | 4.39     | 10   | 0.00423  | 0.941    | 0.3     | 0.0873   | Energy Metabolism             |
| Tryptophan metabolism                               | 41    | 9.99     | 18   | 0.00429  | 1.05     | 0.298   | 0.219    | Amino Acid, Neurotransmitter  |
| Arginine and proline metabolism                     | 38    | 9.26     | 17   | 0.00432  | 1.16     | 0.297   | 0.355    | Amino Acid                    |
| Vitamin B6 metabolism                               | 9     | 2.19     | 6    | 0.00857  | 2.38     | 0.182   | 1.83     | Vitamin                       |
| Glycolysis or Gluconeogenesis                       | 26    | 6.34     | 12   | 0.012    | 1.08     | 0.126   | 0.256    | Energy Metabolism             |
| Folate biosynthesis                                 | 27    | 6.58     | 12   | 0.0169   | 1.31     | 0.0676  | 0.532    | Vitamin, One-Carbon           |
| Pyruvate metabolism                                 | 22    | 5.36     | 10   | 0.024    | 1.14     | 0.00832 | 0.332    | Energy Metabolism             |
| D-Glutamine and D-glutamate metabolism              | 6     | 1.46     | 4    | 0.0341   | 1.2      | -0.0504 | 0.401    | Amino Acid                    |
| Nitrogen metabolism                                 | 6     | 1.46     | 4    | 0.0341   | 0.8      | -0.0504 | -0.0841  | Amino Acid                    |
| Amino sugar and nucleotide sugar metabolism         | 37    | 9.02     | 14   | 0.0456   | 0.861    | -0.0993 | -0.00992 | Nucleotide                    |
| Riboflavin metabolism                               | 4     | 0.975    | 3    | 0.0471   | 3        | -0.105  | 2.59     | Vitamin                       |
| Phenylalanine, tyrosine and tryptophan biosynthesis | 4     | 0.975    | 3    | 0.0471   | 2        | -0.105  | 1.37     | Amino Acid, Neurotransmitter  |
| Sphingolipid metabolism                             | 21    | 5.12     | 9    | 0.0473   | 1.2      | -0.106  | 0.401    | Lipid Metabolism              |

# Developmental Delay Pathway Analysis

| Pathway                                             | Total | Expected | Hits | P.Value  | Topology | PVal.Z  | Topo.Z  | General Pathway Category      |
|-----------------------------------------------------|-------|----------|------|----------|----------|---------|---------|-------------------------------|
| Purine metabolism                                   | 65    | 14.3     | 44   | 8.60E-16 | 2.12     | 4.7     | 1.51    | Nucleotide, One-Carbon        |
| Pyrimidine metabolism                               | 39    | 8.6      | 31   | 1.54E-14 | 2.82     | 4.25    | 2.34    | Nucleotide, One-Carbon        |
| Glycine, serine and threonine metabolism            | 33    | 7.28     | 24   | 4.73E-10 | 1.78     | 2.67    | 1.09    | Amino Acid, Neurotransmitter  |
| Glyoxylate and dicarboxylate metabolism             | 32    | 7.06     | 23   | 1.64E-09 | 1.29     | 2.47    | 0.501   | Energy Metabolism             |
| Alanine, aspartate and glutamate metabolism         | 28    | 6.17     | 19   | 2.08E-07 | 1.63     | 1.73    | 0.91    | Amino Acid, Energy Metabolism |
| Arginine biosynthesis                               | 14    | 3.09     | 12   | 6.64E-07 | 2.08     | 1.55    | 1.45    | Amino Acid                    |
| beta-Alanine metabolism                             | 21    | 4.63     | 15   | 1.59E-06 | 1.6      | 1.42    | 0.874   | Energy Metabolism             |
| Arginine and proline metabolism                     | 38    | 8.38     | 20   | 2.85E-05 | 1.32     | 0.974   | 0.542   | Amino Acid                    |
| One carbon pool by folate                           | 9     | 1.98     | 8    | 3.81E-05 | 4.25     | 0.929   | 4.07    | One-Carbon, Vitamin           |
| Glutathione metabolism                              | 28    | 6.17     | 16   | 4.98E-05 | 1.78     | 0.888   | 1.09    | Redox                         |
| Propanoate metabolism                               | 23    | 5.07     | 14   | 5.79E-05 | 1.36     | 0.865   | 0.59    | Energy Metabolism             |
| Pantothenate and CoA biosynthesis                   | 19    | 4.19     | 12   | 0.000123 | 1.28     | 0.749   | 0.486   | Energy Metabolism, Vitamin    |
| Pentose phosphate pathway                           | 22    | 4.85     | 13   | 0.000166 | 1.52     | 0.703   | 0.783   | Energy Metabolism             |
| Aminoacyl-tRNA biosynthesis                         | 48    | 10.6     | 22   | 0.000171 | 0.532    | 0.698   | -0.412  | Amino Acid                    |
| Amino sugar and nucleotide sugar metabolism         | 37    | 8.16     | 18   | 0.000272 | 1        | 0.627   | 0.152   | Nucleotide                    |
| Citrate cycle (TCA cycle)                           | 20    | 4.41     | 11   | 0.00124  | 1.42     | 0.393   | 0.659   | Energy Metabolism             |
| Glycolysis or Gluconeogenesis                       | 26    | 5.73     | 13   | 0.00145  | 1.2      | 0.37    | 0.393   | Energy Metabolism             |
| Phenylalanine metabolism                            | 10    | 2.21     | 7    | 0.00154  | 1.67     | 0.36    | 0.955   | Amino Acid, Neurotransmitter  |
| Pentose and glucuronate interconversions            | 18    | 3.97     | 10   | 0.00189  | 1        | 0.329   | 0.152   | Energy Metabolism             |
| Valine, leucine and isoleucine biosynthesis         | 8     | 1.76     | 6    | 0.00206  | 0.857    | 0.316   | -0.0205 | Amino Acid, Energy Metabolism |
| Cysteine and methionine metabolism                  | 33    | 7.28     | 15   | 0.00214  | 1.16     | 0.31    | 0.34    | Amino Acid, Redox, One-Carbon |
| Galactose metabolism                                | 27    | 5.95     | 13   | 0.00224  | 0.962    | 0.303   | 0.105   | Energy Metabolism             |
| Vitamin B6 metabolism                               | 9     | 1.98     | 6    | 0.00504  | 2.62     | 0.178   | 2.11    | Vitamin                       |
| Inositol phosphate metabolism                       | 30    | 6.62     | 13   | 0.00696  | 0.931    | 0.129   | 0.0685  | Energy Metabolism             |
| Valine, leucine and isoleucine degradation          | 40    | 8.82     | 16   | 0.00727  | 0.949    | 0.122   | 0.0898  | Amino Acid, Energy Metabolism |
| Butanoate metabolism                                | 15    | 3.31     | 8    | 0.00765  | 1.21     | 0.114   | 0.41    | Energy Metabolism             |
| Pyruvate metabolism                                 | 22    | 4.85     | 10   | 0.0119   | 1.14     | 0.046   | 0.324   | Energy Metabolism             |
| Fructose and mannose metabolism                     | 20    | 4.41     | 9    | 0.0182   | 0.895    | -0.0192 | 0.0248  | Energy Metabolism             |
| D-Glutamine and D-glutamate metabolism              | 6     | 1.32     | 4    | 0.0239   | 1.2      | -0.0609 | 0.393   | Amino Acid                    |
| Nitrogen metabolism                                 | 6     | 1.32     | 4    | 0.0239   | 0.8      | -0.0609 | -0.0893 | Amino Acid                    |
| Nicotinate and nicotinamide metabolism              | 15    | 3.31     | 7    | 0.0295   | 1.5      | -0.0935 | 0.754   | Vitamin                       |
| Riboflavin metabolism                               | 4     | 0.882    | 3    | 0.0356   | 3        | -0.122  | 2.56    | Vitamin                       |
| Phenylalanine, tyrosine and tryptophan biosynthesis | 4     | 0.882    | 3    | 0.0356   | 2.33     | -0.122  | 1.76    | Amino Acid, Neurotransmitter  |
| Neomycin, kanamycin and gentamicin biosynthesis     | 2     | 0.441    | 2    | 0.0485   | 2        | -0.17   | 1.36    |                               |
