# Supplementary material for: Central Nervous System Metabolism in Autism, Epilepsy and Developmental Delays: A Cerebrospinal Fluid Analysis
Source: MDPI journal article supplement (doi:10.3390/metabo12050371), 2022-04-20
Supplement: s1 [file s1]

**Table S3.** Patient characteristics for three neurodevelopmental groups, including age at sample acquisition, sex, source of sample collection, history of epilepsy and perioperative medications.

| Autism Spectrum Disorder |     |        |     |                                                                                                                                                                                                                                                 | Developmental Delay |     |        |     |                                                                                                                | Control |     |        |     |                                                                                                                         |
|--------------------------|-----|--------|-----|-------------------------------------------------------------------------------------------------------------------------------------------------------------------------------------------------------------------------------------------------|---------------------|-----|--------|-----|----------------------------------------------------------------------------------------------------------------|---------|-----|--------|-----|-------------------------------------------------------------------------------------------------------------------------|
| Age                      | Sex | Source | Epi | Perioperative Medications                                                                                                                                                                                                                       | Age                 | Sex | Source | Epi | Perioperative Medications                                                                                      | Age     | Sex | Source | Epi | Perioperative Medications                                                                                               |
| 15y                      | F   | PF     | N   | levothyroxine, metformin, gabapentin, amitriptyline, hydrocodone, cefazolin, litramine, balsalazide, diazepam, clonidine, lidocaine, oxycodone, propofol, fentanyl, dexmedetomidine, dexamethasone, ondansetron, ketamine, midazolam, cefazolin | 14y                 | F   | BV     | N   | lisinopril, ibuprofen, dexmedetomidine, pantoprazole, ketorolac, acetazolamide, docusate, fentanyl, rocuronium | 15y     | F   | PF     | N   | fentanyl, propofol, rocuronium, lidocaine, metoclopramide, Ondansetron, midazolam, cyproheptadine, naproxen, alprazolam |
| 4y                       | M   | BV     | Y   | ranitidine, lacosamide, clonazepam, fentanyl, dexmedetomidine, dexamethasone, rocuronium                                                                                                                                                        | 4y                  | M   | PF     | N   | Cefazolin, rocuronium, fentanyl, propofol, ondansetron, dexmedetomidine, glycopyrrolate                        | 4y      | F   | BV     | N   | cetirizine, ondansetron, cefazolin, propofol, glycopyrrolate, fentanyl, vecuronium                                      |
| 16y                      | M   | BV     | Y   | levetiracetam, methylphenidate, lacosamide, trazodone, cefazolin, ketamine, glycopyrrolate, midazolam, propofol, rocuronium, fentanyl dexamethasone, hydromorphone                                                                              | 16y                 | F   | PF     | N   | Cefazolin, propofol, fentanyl, morphine, ketamine, dexamethasone, toradol, acetaminophen                       | 17y     | M   | BV     | N   | Protein supplement, MVI, cefazolin, propofol, fentanyl, ondansetron, glycopyrrolate, clonidine                          |
| 12y                      | M   | SC     | N   | risperidone, cimetidine, propofol, lidocaine, dexmedetomidine, dexamethasone, Benadryl, fentanyl, hydromorphone, ondansetron                                                                                                                    | 15y                 | M   | SC     | N   | ondansetron, midazolam, rocuronium, clindamycin, coenzyme Q10, levocarnitine, baclofen                         | 11y     | M   | SC     | N   | cefuroxime, gentamycin, lorazepam, midazolam, dexamethasone                                                             |
| 13y                      | F   | BV     | N   | OCPs, midazolam, fentanyl, lidocaine, propofol, rocuronium, ondansetron                                                                                                                                                                         | 10y                 | F   | PF     | N   | cefazolin, midazolam, propofol, dexamethasone, fentanyl                                                        | 13y     | F   | PF     | N   | Cefazolin, propofol, dexmedetomidine, lidocaine, fentanyl, ketamine, ondansetron, midazolam                             |
| 12y                      | F   | BV     | N   | atomoxetine, darifenacin, clonidine, hydroxyzine, cefazolin, propofol, rocuronium, fentanyl, midazolam                                                                                                                                          | 10y                 | F   | PF     | Y   | midazolam, cefuroxime, propofol, dexmedetomidine, fentanyl, ondansetron, morphine, dexamethasone               | 12y     | F   | PF     | N   | Cefazolin, propofol, rocuronium, ondansetron, midazolam, fentanyl, dexamethasone, dexmedetomidine                       |
| 8y                       | F   | BV     | N   | levetiracetam, loratadine, pyridoxine, leuprorelin, cefazolin, dexamethasone, propofol, rocuronium, fentanyl, midazolam, mannitol, dexmedetomidine                                                                                              | 5y                  | F   | BV     | N   | MVI, cefazolin, fentanyl, midazolam, dexmedetomidine, propofol                                                 | 8y      | F   | PF     | N   | rocuronium, midazolam, mannitol, cefazolin                                                                              |

|       |   |    |   |                                                                                                                                                       |      |    |    |    |                                                                                                                                       |                                                                                                                          |
|-------|---|----|---|-------------------------------------------------------------------------------------------------------------------------------------------------------|------|----|----|----|---------------------------------------------------------------------------------------------------------------------------------------|--------------------------------------------------------------------------------------------------------------------------|
| 8y    | M | BV | N | midazolam, vancomycin, cefuroxime, propofol, fentanyl, dexamethasone                                                                                  |      | 8y | M  | BC | N                                                                                                                                     | Cefazolin, propofol, dexamethasone                                                                                       |
| 4m    | M | BV | N | Cefazolin, dexamethasone, ondansetron, atropine, fentanyl, midazolam                                                                                  | 3m   | M  | BV | Y  | levetiracetam, phenobarbital, propofol, rocuronium, fentanyl, glycopyrrolate, morphine, clonidine                                     |                                                                                                                          |
| 2y10m | M | SC | N | Cefazolin, propofol, dexmedetomidine, fentanyl, dexamethasone, morphine, midazolam                                                                    | 3y   | M  | SC | N  | Cefazolin, fentanyl, propofol, dexmedetomidine, ondansetron,                                                                          | levetiracetam, ranitidine, cefuroxime, morphine, lidocaine, propofol, glycopyrrolate, Toradol, ketamine, dexmedetomidine |
| 1y3m  | M | SC | Y | cefazolin, propofol, rocuronium, fentanyl, ketamine, dexamethasone, ondansetron, glycopyrrolate                                                       | 1y1m | M  | SC | N  | lansoprazole, cefazolin, fentanyl, midazolam, ondansetron, propofol                                                                   | Cefazolin, fentanyl, dexamethasone, ondansetron, morphine                                                                |
| 5y    | M | BC | N | montelukast, fluticasone, salmeterol, fluticasone, cetirizine, cefazolin, propofol, fentanyl, lidocaine, ondansetron, dexmedetomidine                 |      |    |    |    |                                                                                                                                       | dexamethasone, vancomycin, pantoprazole, lorazepam, midazolam, fentanyl                                                  |
| 9y    | M | PF | N | Cefazolin,, midazolam, fentanyl, propofol, clonidine                                                                                                  | 9.5y | M  | PF | N  | Cefazolin, rocuronium, fentanyl, ketamine, dexmedetomidine, ondansetron, glycopyrrolate                                               | triamcinolone, fluoxetine, cefuroxime, dexamethasone, ondansetron, propofol, fentanyl, dexmedetomidine                   |
| 1m    | M | BV | N | amoxicillin, gentamicin, vancomycin, TPN, propofol, fentanyl                                                                                          | 1m   | M  | BV | N  | furosemide, amiodarone, cefazolin, calciferol, lansoprazole, caffeine, acetaminophen, dexmedetomidine, TPN, fentanyl, glycopyrrolate, | Cefazolin, propofol, fentanyl, acetaminophen, dexmedetomidine                                                            |
| 2y8m  | M | BV | N | Cefazolin, propofol, rocuronium, fentanyl, ondansetron, cefazolin, glycopyrrolate, clonidine, midazolam                                               |      |    |    |    |                                                                                                                                       | cefdinir, clindamycin, fentanyl, ondansetron, ketamine, dexmedetomidine, propofol, midazolam, rocuronium, glycopyrrolate |
| 6y    | M | SC | N | cetirizine, clonidine, Probiotic, melatonin, polyethylene glycol, cefazolin, dexmedetomidine, calcium gluconate, glycopyrrolate, fentanyl, midazolam, |      |    |    |    |                                                                                                                                       | polyethylene glycol, senna, cefazolin, fentanyl, ondansetron, dexamethasone, dexmedetomidine, propofol                   |

|     |   |    |   |                                                                                                                                                                                      |    |    |    |    |                                                                                                                           |                                                                                                  |   |    |   |                                                                                                              |
|-----|---|----|---|--------------------------------------------------------------------------------------------------------------------------------------------------------------------------------------|----|----|----|----|---------------------------------------------------------------------------------------------------------------------------|--------------------------------------------------------------------------------------------------|---|----|---|--------------------------------------------------------------------------------------------------------------|
| 8y  | M | BC | Y | clonidine, dexamethasone, risperidone, levetiracetam, ondansetron                                                                                                                    |    | 8y | M  | BV | N                                                                                                                         | dexamethasone, propofol, morphine, fentanyl, cefuroxime, levetiracetam, melatonin, acetaminophen |   |    |   |                                                                                                              |
| 18m | M | SC | N | Cefazolin, fentanyl, propofol, dexamethasone                                                                                                                                         | 2y | M  | SC | N  | Cefazolin, fentanyl, propofol, hydromorphone, dexmedetomidine, ondansetron, midazolam                                     | 1y6m                                                                                             | M | SC | N | polyethylene glycol, cefazolin, fentanyl, propofol, dexamethasone, clonidine, ketamine                       |
| 3y  | M | PF | N | cefuroxime, fentanyl, propofol, Ondansetron                                                                                                                                          | 4y | F  | PF | N  | cefuroxime, naproxen, clonidine, cyproheptadine, fentanyl, propofol, dexmedetomidine, glycopyrrolate, morphine, midazolam | 3y                                                                                               | M | PF | N | Midazolam, dexamethasone, dexmedetomidine, fentanyl, morphine                                                |
| 4m  | F | BV | Y | fentanyl, rocuronium, propofol, lidocaine, midazolam, neostigmine, glycopyrrolate, vancomycin, cefazolin, phenobarbital, levetiracetam, topiramate                                   |    |    |    |    |                                                                                                                           | 5m                                                                                               | M | BC | Y | cefazolin, rocuronium, fentanyl, calcium, neostigmine, glycopyrrolate, phenylephrine, zonisamide, topiramate |
| 12y | M | SC | Y | aripiprazole, clonidine, acetazolamide, lansoprazole, ibuprofen, guaifenesin, naproxen, pseudoephedrine, MVI, propofol, lidocaine, dexmedetomidine, cefazolin, ondansetron, morphine |    |    |    |    |                                                                                                                           | 12y                                                                                              | M | SC | N | Cefazolin, ketamine, rocuronium, fentanyl, dexamethasone, propofol, dexmedetomidine, ondansetron             |
| 12y | M | PF | N | oxcarbazepine, hydroxyzine, cefazolin, fentanyl, midazolam, propofol, vecuronium                                                                                                     |    |    |    |    |                                                                                                                           | 12y                                                                                              | M | BV | N | Cefazolin, ondansetron, midazolam, fentanyl                                                                  |
| 10y | M | SC | N | Cefuroxime, dexmedetomidine, propofol, fentanyl, dexamethasone, hydromorphone                                                                                                        |    |    |    |    |                                                                                                                           | 10y                                                                                              | M | SC | N | oxybutynin, cefuroxime, lidocaine, propofol, dexamethasone, dexmedetomidine, fentanyl, morphine              |
| 4y  | M | BV | N | , mannitol, rocuronium, fentanyl, midazolam, heparin, dexmedetomidine, polyethylene glycol, acetaminophen, morphine, cefazolin                                                       | 4y | M  | BC | Y  | levetiracetam, clonazepam, cefazolin, fentanyl, propofol, dexamethasone, ondansetron, dexmedetomidine                     | 4y                                                                                               | M | PF | N | Cefazolin, propofol, dexmedetomidine, fentanyl, midazolam, ondansetron                                       |
| 3m  | M | BV | N | cefazolin, rocuronium, fentanyl                                                                                                                                                      |    |    |    |    |                                                                                                                           | 6m                                                                                               | M | BV | N | clonidine, lansoprazole, cefuroxime,                                                                         |

|  |  |  |  |  |  |  |  |  |  |  |  |  |  |  |  |  |  |  |  |  |  |  |  |  |  |  |  |  |  |  |  |  |  |  |  |  |  |  |  |  |  |  |  |  |  |  |  |  |  |  |  |  |  |  |  |  |  |  |  |  |  |  |  |  |  |  |  |  |  |  |  |  |  |  |  |  |  |  |  |  |  |  |  |  |  |  |  |  |  |  |  |  |  |  |  |  |  |  |  |  |  |  |  |  |  |  |  |  |  |  |  |  |  |  |  |  |  |  |  |  |  |  |  |  |  |  |  |  |  |  |  |  |  |  |  |  |  |  |  |  |  |  |  |  |  |  |  |  |  |  |  |  |  |  |  |  |  |  |  |  |  |  |  |  |  |  |  |  |  |  |  |  |  |  |  |  |  |  |  |  |  |  |  |  |  |  |  |  |  |  |  |  |  |  |  |  |  |  |  |  |  |  |  |  |  |  |  |  |  |  |  |  |  |  |  |  |  |  |  |  |  |  |  |  |  |  |  |  |  |  |  |  |  |  |  |  |  |  |  |  |  |  |  |  |  |  |  |  |  |  |  |  |  |  |  |  |  |  |  |  |  |  |  |  |  |  |  |  |  |  |  |  |  |  |  |  |  |  |  |  |  |  |  |  |  |  |  |  |  |  |  |  |  |  |  |  |  |  |  |  |  |  |  |  |  |  |  |  |  |  |  |  |  |  |  |  |  |  |  |  |  |  |  |  |  |  |  |  |  |  |  |  |  |  |  |  |  |  |  |  |  |  |  |  |  |  |  |  |  |  |  |  |  |  |  |  |  |  |  |  |  |  |  |  |  |  |  |  |  |  |  |  |  |  |  |  |  |  |  |  |  |  |  |  |  |  |  |  |  |  |  |  |  |  |  |  |  |  |  |  |  |  |  |  |  |  |  |  |  |  |  |  |  |  |  |  |  |  |  |  |  |  |  |  |  |  |  |  |  |  |  |  |  |  |  |  |  |  |  |  |  |  |  |  |  |  |  |  |  |  |  |  |  |  |  |  |  |  |  |  |  |  |  |  |  |  |  |  |  |  |  |  |  |  |  |  |  |  |  |  |  |  |  |  |  |  |  |  |  |  |  |  |  |  |  |  |  |  |  |  |  |  |  |  |  |  |  |  |  |  |  |  |  |  |  |  |  |  |  |  |  |  |  |  |  |  |  |  |  |  |  |  |  |  |  |  |  |  |  |  |  |  |  |  |  |  |  |  |  |  |  |  |  |  |  |  |  |  |  |  |  |  |  |  |  |  |  |  |  |  |  |  |  |  |  |  |  |  |  |  |  |  |  |  |  |  |  |  |  |  |  |  |  |  |  |  |  |  |  |  |  |  |  |  |  |  |  |  |  |  |  |  |  |  |  |  |  |  |  |  |  |  |  |  |  |  |  |  |  |  |  |  |  |  |  |  |  |  |  |  |  |  |  |  |  |  |  |  |  |  |  |  |  |  |  |  |  |  |  |  |  |  |  |  |  |  |  |  |  |  |  |  |  |  |  |  |  |  |  |  |  |  |  |  |  |  |  |  |  |  |  |  |  |  |  |  |  |  |  |  |  |  |  |  |  |  |  |  |  |  |  |  |  |  |  |  |  |  |  |  |  |  |  |  |  |  |  |  |  |  |  |  |  |  |  |  |  |  |  |  |  |  |  |  |  |  |  |  |  |  |  |  |  |  |  |  |  |  |  |  |  |  |  |  |  |  |  |  |  |  |  |  |  |  |  |  |  |  |  |  |  |  |  |  |  |  |  |  |  |  |  |  |  |  |  |  |  |  |  |  |  |  |  |  |  |  |  |  |  |  |  |  |  |  |  |  |  |  |  |  |  |  |  |  |  |  |  |  |  |  |  |  |  |  |  |  |  |  |  |  |  |  |  |  |  |  |  |  |  |  |  |  |  |  |  |  |  |  |  |  |  |  |  |  |  |  |  |  |  |  |  |  |  |  |  |  |  |  |  |  |  |  |  |  |  |  |  |  |  |  |  |  |  |  |  |  |  |  |  |  |  |  |  |  |  |  |  |  |  |  |  |  |  |  |  |  |  |  |  |  |  |  |  |  |  |  |  |  |  |  |  |  |  |  |  |  |  |  |  |  |  |  |  |  |  |  |  |  |  |  |  |  |  |  |  |  |  |  |  |  |  |  |  |  |  |  |  |  |  |  |  |  |  |  |  |  |  |  |  |  |  |  |  |  |  |  |  |  |  |  |  |  |  |  |  |  |  |  |  |  |  |  |  |  |  |  |  |  |  |  |  |  |  |  |  |  |  |  |  |  |  |  |  |  |  |  |  |  |  |  |  |  |  |  |  |  |  |  |  |  |  |  |  |  |  |  |  |  |  |  |  |  |  |  |  |  |  |  |  |  |  |  |  |  |  |  |  |  |  |  |  |  |  |  |  |  |  |  |  |  |  |  |  |  |  |  |  |  |  |  |  |  |  |  |  |  |  |  |  |  |  |  |  |  |  |  |  |  |  |  |  |  |  |  |  |  |  |  |  |  |  |  |  |  |  |  |  |  |  |  |  |  |  |  |  |  |  |  |  |  |  |  |  |  |  |  |  |  |  |  |  |  |  |  |  |  |  |  |  |  |  |  |  |  |  |  |  |  |  |  |  |  |  |  |  |  |  |  |  |  |  |  |  |  |  |  |  |  |  |  |  |  |  |  |  |  |  |  |  |  |  |  |  |  |  |  |  |  |  |  |  |  |  |  |  |  |  |  |  |  |  |  |  |  |  |  |  |  |  |  |  |  |  |  |  |  |  |  |  |  |  |  |  |  |  |  |  |  |  |  |  |  |  |  |  |  |  |  |  |  |  |  |  |  |  |  |  |  |  |  |  |  |  |  |  |  |  |  |  |  |  |  |  |  |  |  |  |  |  |  |  |  |  |  |  |  |  |  |  |  |  |  |  |  |  |  |  |  |  |  |  |  |  |  |  |  |  |  |  |  |  |  |  |  |  |  |  |  |  |  |  |  |  |  |  |  |  |  |  |  |  |  |  |  |  |  |  |  |  |  |  |  |  |  |  |  |  |  |  |  |  |  |  |  |  |  |
|--|--|--|--|--|--|--|--|--|--|--|--|--|--|--|--|--|--|--|--|--|--|--|--|--|--|--|--|--|--|--|--|--|--|--|--|--|--|--|--|--|--|--|--|--|--|--|--|--|--|--|--|--|--|--|--|--|--|--|--|--|--|--|--|--|--|--|--|--|--|--|--|--|--|--|--|--|--|--|--|--|--|--|--|--|--|--|--|--|--|--|--|--|--|--|--|--|--|--|--|--|--|--|--|--|--|--|--|--|--|--|--|--|--|--|--|--|--|--|--|--|--|--|--|--|--|--|--|--|--|--|--|--|--|--|--|--|--|--|--|--|--|--|--|--|--|--|--|--|--|--|--|--|--|--|--|--|--|--|--|--|--|--|--|--|--|--|--|--|--|--|--|--|--|--|--|--|--|--|--|--|--|--|--|--|--|--|--|--|--|--|--|--|--|--|--|--|--|--|--|--|--|--|--|--|--|--|--|--|--|--|--|--|--|--|--|--|--|--|--|--|--|--|--|--|--|--|--|--|--|--|--|--|--|--|--|--|--|--|--|--|--|--|--|--|--|--|--|--|--|--|--|--|--|--|--|--|--|--|--|--|--|--|--|--|--|--|--|--|--|--|--|--|--|--|--|--|--|--|--|--|--|--|--|--|--|--|--|--|--|--|--|--|--|--|--|--|--|--|--|--|--|--|--|--|--|--|--|--|--|--|--|--|--|--|--|--|--|--|--|--|--|--|--|--|--|--|--|--|--|--|--|--|--|--|--|--|--|--|--|--|--|--|--|--|--|--|--|--|--|--|--|--|--|--|--|--|--|--|--|--|--|--|--|--|--|--|--|--|--|--|--|--|--|--|--|--|--|--|--|--|--|--|--|--|--|--|--|--|--|--|--|--|--|--|--|--|--|--|--|--|--|--|--|--|--|--|--|--|--|--|--|--|--|--|--|--|--|--|--|--|--|--|--|--|--|--|--|--|--|--|--|--|--|--|--|--|--|--|--|--|--|--|--|--|--|--|--|--|--|--|--|--|--|--|--|--|--|--|--|--|--|--|--|--|--|--|--|--|--|--|--|--|--|--|--|--|--|--|--|--|--|--|--|--|--|--|--|--|--|--|--|--|--|--|--|--|--|--|--|--|--|--|--|--|--|--|--|--|--|--|--|--|--|--|--|--|--|--|--|--|--|--|--|--|--|--|--|--|--|--|--|--|--|--|--|--|--|--|--|--|--|--|--|--|--|--|--|--|--|--|--|--|--|--|--|--|--|--|--|--|--|--|--|--|--|--|--|--|--|--|--|--|--|--|--|--|--|--|--|--|--|--|--|--|--|--|--|--|--|--|--|--|--|--|--|--|--|--|--|--|--|--|--|--|--|--|--|--|--|--|--|--|--|--|--|--|--|--|--|--|--|--|--|--|--|--|--|--|--|--|--|--|--|--|--|--|--|--|--|--|--|--|--|--|--|--|--|--|--|--|--|--|--|--|--|--|--|--|--|--|--|--|--|--|--|--|--|--|--|--|--|--|--|--|--|--|--|--|--|--|--|--|--|--|--|--|--|--|--|--|--|--|--|--|--|--|--|--|--|--|--|--|--|--|--|--|--|--|--|--|--|--|--|--|--|--|--|--|--|--|--|--|--|--|--|--|--|--|--|--|--|--|--|--|--|--|--|--|--|--|--|--|--|--|--|--|--|--|--|--|--|--|--|--|--|--|--|--|--|--|--|--|--|--|--|--|--|--|--|--|--|--|--|--|--|--|--|--|--|--|--|--|--|--|--|--|--|--|--|--|--|--|--|--|--|--|--|--|--|--|--|--|--|--|--|--|--|--|--|--|--|--|--|--|--|--|--|--|--|--|--|--|--|--|--|--|--|--|--|--|--|--|--|--|--|--|--|--|--|--|--|--|--|--|--|--|--|--|--|--|--|--|--|--|--|--|--|--|--|--|--|--|--|--|--|--|--|--|--|--|--|--|--|--|--|--|--|--|--|--|--|--|--|--|--|--|--|--|--|--|--|--|--|--|--|--|--|--|--|--|--|--|--|--|--|--|--|--|--|--|--|--|--|--|--|--|--|--|--|--|--|--|--|--|--|--|--|--|--|--|--|--|--|--|--|--|--|--|--|--|--|--|--|--|--|--|--|--|--|--|--|--|--|--|--|--|--|--|--|--|--|--|--|--|--|--|--|--|--|--|--|--|--|--|--|--|--|--|--|--|--|--|--|--|--|--|--|--|--|--|--|--|--|--|--|--|--|--|--|--|--|--|--|--|--|--|--|--|--|--|--|--|--|--|--|--|--|--|--|--|--|--|--|--|--|--|--|--|--|--|--|--|--|--|--|--|--|--|--|--|--|--|--|--|--|--|--|--|--|--|--|--|--|--|--|--|--|--|--|--|--|--|--|--|--|--|--|--|--|--|--|--|--|--|--|--|--|--|--|--|--|--|--|--|--|--|--|--|--|--|--|--|--|--|--|--|--|--|--|--|--|--|--|--|--|--|--|--|--|--|--|--|--|--|--|--|--|--|--|--|--|--|--|--|--|--|--|--|--|--|--|--|--|--|--|--|--|--|--|--|--|--|--|--|--|--|--|--|--|--|--|--|--|--|--|--|--|--|--|--|--|--|--|--|--|--|--|--|--|--|--|--|--|--|--|--|--|--|--|--|--|--|--|--|--|--|--|--|--|--|--|--|--|--|--|--|--|--|--|--|--|--|--|--|--|--|--|--|--|--|--|--|--|--|--|--|--|--|--|--|--|--|--|--|--|--|--|--|--|--|--|--|--|--|--|--|--|--|--|--|--|--|--|--|--|--|--|--|--|--|--|--|--|--|--|--|--|--|--|--|--|--|--|--|--|--|--|--|--|--|--|--|--|--|--|--|--|--|--|--|--|--|--|--|--|--|--|--|--|--|--|--|--|--|--|--|--|--|--|--|--|--|--|--|--|--|--|--|--|--|--|--|--|--|--|--|--|--|--|--|--|--|--|--|--|--|--|--|--|--|--|--|--|--|--|--|--|--|--|--|--|--|--|--|--|--|--|--|--|--|--|--|--|--|--|--|--|--|--|--|--|--|--|--|--|--|
|  |  |  |  |  |  |  |  |  |  |  |  |  |  |  |  |  |  |  |  |  |  |  |  |  |  |  |  |  |  |  |  |  |  |  |  |  |  |  |  |  |  |  |  |  |  |  |  |  |  |  |  |  |  |  |  |  |  |  |  |  |  |  |  |  |  |  |  |  |  |  |  |  |  |  |  |  |  |  |  |  |  |  |  |  |  |  |  |  |  |  |  |  |  |  |  |  |  |  |  |  |  |  |  |  |  |  |  |  |  |  |  |  |  |  |  |  |  |  |  |  |  |  |  |  |  |  |  |  |  |  |  |  |  |  |  |  |  |  |  |  |  |  |  |  |  |  |  |  |  |  |  |  |  |  |  |  |  |  |  |  |  |  |  |  |  |  |  |  |  |  |  |  |  |  |  |  |  |  |  |  |  |  |  |  |  |  |  |  |  |  |  |  |  |  |  |  |  |  |  |  |  |  |  |  |  |  |  |  |  |  |  |  |  |  |  |  |  |  |  |  |  |  |  |  |  |  |  |  |  |  |  |  |  |  |  |  |  |  |  |  |  |  |  |  |  |  |  |  |  |  |  |  |  |  |  |  |  |  |  |  |  |  |  |  |  |  |  |  |  |  |  |  |  |  |  |  |  |  |  |  |  |  |  |  |  |  |  |  |  |  |  |  |  |  |  |  |  |  |  |  |  |  |  |  |  |  |  |  |  |  |  |  |  |  |  |  |  |  |  |  |  |  |  |  |  |  |  |  |  |  |  |  |  |  |  |  |  |  |  |  |  |  |  |  |  |  |  |  |  |  |  |  |  |  |  |  |  |  |  |  |  |  |  |  |  |  |  |  |  |  |  |  |  |  |  |  |  |  |  |  |  |  |  |  |  |  |  |  |  |  |  |  |  |  |  |  |  |  |  |  |  |  |  |  |  |  |  |  |  |  |  |  |  |  |  |  |  |  |  |  |  |  |  |  |  |  |  |  |  |  |  |  |  |  |  |  |  |  |  |  |  |  |  |  |  |  |  |  |  |  |  |  |  |  |  |  |  |  |  |  |  |  |  |  |  |  |  |  |  |  |  |  |  |  |  |  |  |  |  |  |  |  |  |  |  |  |  |  |  |  |  |  |  |  |  |  |  |  |  |  |  |  |  |  |  |  |  |  |  |  |  |  |  |  |  |  |  |  |  |  |  |  |  |  |  |  |  |  |  |  |  |  |  |  |  |  |  |  |  |  |  |  |  |  |  |  |  |  |  |  |  |  |  |  |  |  |  |  |  |  |  |  |  |  |  |  |  |  |  |  |  |  |  |  |  |  |  |  |  |  |  |  |  |  |  |  |  |  |  |  |  |  |  |  |  |  |  |  |  |  |  |  |  |  |  |  |  |  |  |  |  |  |  |  |  |  |  |  |  |  |  |  |  |  |  |  |  |  |  |  |  |  |  |  |  |  |  |  |  |  |  |  |  |  |  |  |  |  |  |  |  |  |  |  |  |  |  |  |  |  |  |  |  |  |  |  |  |  |  |  |  |  |  |  |  |  |  |  |  |  |  |  |  |  |  |  |  |  |  |  |  |  |  |  |  |  |  |  |  |  |  |  |  |  |  |  |  |  |  |  |  |  |  |  |  |  |  |  |  |  |  |  |  |  |  |  |  |  |  |  |  |  |  |  |  |  |  |  |  |  |  |  |  |  |  |  |  |  |  |  |  |  |  |  |  |  |  |  |  |  |  |  |  |  |  |  |  |  |  |  |  |  |  |  |  |  |  |  |  |  |  |  |  |  |  |  |  |  |  |  |  |  |  |  |  |  |  |  |  |  |  |  |  |  |  |  |  |  |  |  |  |  |  |  |  |  |  |  |  |  |  |  |  |  |  |  |  |  |  |  |  |  |  |  |  |  |  |  |  |  |  |  |  |  |  |  |  |  |  |  |  |  |  |  |  |  |  |  |  |  |  |  |  |  |  |  |  |  |  |  |  |  |  |  |  |  |  |  |  |  |  |  |  |  |  |  |  |  |  |  |  |  |  |  |  |  |  |  |  |  |  |  |  |  |  |  |  |  |  |  |  |  |  |  |  |  |  |  |  |  |  |  |  |  |  |  |  |  |  |  |  |  |  |  |  |  |  |  |  |  |  |  |  |  |  |  |  |  |  |  |  |  |  |  |  |  |  |  |  |  |  |  |  |  |  |  |  |  |  |  |  |  |  |  |  |  |  |  |  |  |  |  |  |  |  |  |  |  |  |  |  |  |  |  |  |  |  |  |  |  |  |  |  |  |  |  |  |  |  |  |  |  |  |  |  |  |  |  |  |  |  |  |  |  |  |  |  |  |  |  |  |  |  |  |  |  |  |  |  |  |  |  |  |  |  |  |  |  |  |  |  |  |  |  |  |  |  |  |  |  |  |  |  |  |  |  |  |  |  |  |  |  |  |  |  |  |  |  |  |  |  |  |  |  |  |  |  |  |  |  |  |  |  |  |  |  |  |  |  |  |  |  |  |  |  |  |  |  |  |  |  |  |  |  |  |  |  |  |  |  |  |  |  |  |  |  |  |  |  |  |  |  |  |  |  |  |  |  |  |  |  |  |  |  |  |  |  |  |  |  |  |  |  |  |  |  |  |  |  |  |  |  |  |  |  |  |  |  |  |  |  |  |  |  |  |  |  |  |  |  |  |  |  |  |  |  |  |  |  |  |  |  |  |  |  |  |  |  |  |  |  |  |  |  |  |  |  |  |  |  |  |  |  |  |  |  |  |  |  |  |  |  |  |  |  |  |  |  |  |  |  |  |  |  |  |  |  |  |  |  |  |  |  |  |  |  |  |  |  |  |  |  |  |  |  |  |  |  |  |  |  |  |  |  |  |  |  |  |  |  |  |  |  |  |  |  |  |  |  |  |  |  |  |  |  |  |  |  |  |  |  |  |  |  |  |  |  |  |  |  |  |  |  |  |  |  |  |  |  |  |  |  |  |  |  |  |  |  |  |  |  |  |  |  |  |  |  |  |  |  |  |  |  |  |  |  |  |  |  |  |  |  |  |  |  |  |  |  |  |  |  |  |  |  |  |  |  |  |  |  |  |  |  |  |  |  |
|--|--|--|--|--|--|--|--|--|--|--|--|--|--|--|--|--|--|--|--|--|--|--|--|--|--|--|--|--|--|--|--|--|--|--|--|--|--|--|--|--|--|--|--|--|--|--|--|--|--|--|--|--|--|--|--|--|--|--|--|--|--|--|--|--|--|--|--|--|--|--|--|--|--|--|--|--|--|--|--|--|--|--|--|--|--|--|--|--|--|--|--|--|--|--|--|--|--|--|--|--|--|--|--|--|--|--|--|--|--|--|--|--|--|--|--|--|--|--|--|--|--|--|--|--|--|--|--|--|--|--|--|--|--|--|--|--|--|--|--|--|--|--|--|--|--|--|--|--|--|--|--|--|--|--|--|--|--|--|--|--|--|--|--|--|--|--|--|--|--|--|--|--|--|--|--|--|--|--|--|--|--|--|--|--|--|--|--|--|--|--|--|--|--|--|--|--|--|--|--|--|--|--|--|--|--|--|--|--|--|--|--|--|--|--|--|--|--|--|--|--|--|--|--|--|--|--|--|--|--|--|--|--|--|--|--|--|--|--|--|--|--|--|--|--|--|--|--|--|--|--|--|--|--|--|--|--|--|--|--|--|--|--|--|--|--|--|--|--|--|--|--|--|--|--|--|--|--|--|--|--|--|--|--|--|--|--|--|--|--|--|--|--|--|--|--|--|--|--|--|--|--|--|--|--|--|--|--|--|--|--|--|--|--|--|--|--|--|--|--|--|--|--|--|--|--|--|--|--|--|--|--|--|--|--|--|--|--|--|--|--|--|--|--|--|--|--|--|--|--|--|--|--|--|--|--|--|--|--|--|--|--|--|--|--|--|--|--|--|--|--|--|--|--|--|--|--|--|--|--|--|--|--|--|--|--|--|--|--|--|--|--|--|--|--|--|--|--|--|--|--|--|--|--|--|--|--|--|--|--|--|--|--|--|--|--|--|--|--|--|--|--|--|--|--|--|--|--|--|--|--|--|--|--|--|--|--|--|--|--|--|--|--|--|--|--|--|--|--|--|--|--|--|--|--|--|--|--|--|--|--|--|--|--|--|--|--|--|--|--|--|--|--|--|--|--|--|--|--|--|--|--|--|--|--|--|--|--|--|--|--|--|--|--|--|--|--|--|--|--|--|--|--|--|--|--|--|--|--|--|--|--|--|--|--|--|--|--|--|--|--|--|--|--|--|--|--|--|--|--|--|--|--|--|--|--|--|--|--|--|--|--|--|--|--|--|--|--|--|--|--|--|--|--|--|--|--|--|--|--|--|--|--|--|--|--|--|--|--|--|--|--|--|--|--|--|--|--|--|--|--|--|--|--|--|--|--|--|--|--|--|--|--|--|--|--|--|--|--|--|--|--|--|--|--|--|--|--|--|--|--|--|--|--|--|--|--|--|--|--|--|--|--|--|--|--|--|--|--|--|--|--|--|--|--|--|--|--|--|--|--|--|--|--|--|--|--|--|--|--|--|--|--|--|--|--|--|--|--|--|--|--|--|--|--|--|--|--|--|--|--|--|--|--|--|--|--|--|--|--|--|--|--|--|--|--|--|--|--|--|--|--|--|--|--|--|--|--|--|--|--|--|--|--|--|--|--|--|--|--|--|--|--|--|--|--|--|--|--|--|--|--|--|--|--|--|--|--|--|--|--|--|--|--|--|--|--|--|--|--|--|--|--|--|--|--|--|--|--|--|--|--|--|--|--|--|--|--|--|--|--|--|--|--|--|--|--|--|--|--|--|--|--|--|--|--|--|--|--|--|--|--|--|--|--|--|--|--|--|--|--|--|--|--|--|--|--|--|--|--|--|--|--|--|--|--|--|--|--|--|--|--|--|--|--|--|--|--|--|--|--|--|--|--|--|--|--|--|--|--|--|--|--|--|--|--|--|--|--|--|--|--|--|--|--|--|--|--|--|--|--|--|--|--|--|--|--|--|--|--|--|--|--|--|--|--|--|--|--|--|--|--|--|--|--|--|--|--|--|--|--|--|--|--|--|--|--|--|--|--|--|--|--|--|--|--|--|--|--|--|--|--|--|--|--|--|--|--|--|--|--|--|--|--|--|--|--|--|--|--|--|--|--|--|--|--|--|--|--|--|--|--|--|--|--|--|--|--|--|--|--|--|--|--|--|--|--|--|--|--|--|--|--|--|--|--|--|--|--|--|--|--|--|--|--|--|--|--|--|--|--|--|--|--|--|--|--|--|--|--|--|--|--|--|--|--|--|--|--|--|--|--|--|--|--|--|--|--|--|--|--|--|--|--|--|--|--|--|--|--|--|--|--|--|--|--|--|--|--|--|--|--|--|--|--|--|--|--|--|--|--|--|--|--|--|--|--|--|--|--|--|--|--|--|--|--|--|--|--|--|--|--|--|--|--|--|--|--|--|--|--|--|--|--|--|--|--|--|--|--|--|--|--|--|--|--|--|--|--|--|--|--|--|--|--|--|--|--|--|--|--|--|--|--|--|--|--|--|--|--|--|--|--|--|--|--|--|--|--|--|--|--|--|--|--|--|--|--|--|--|--|--|--|--|--|--|--|--|--|--|--|--|--|--|--|--|--|--|--|--|--|--|--|--|--|--|--|--|--|--|--|--|--|--|--|--|--|--|--|--|--|--|--|--|--|--|--|--|--|--|--|--|--|--|--|--|--|--|--|--|--|--|--|--|--|--|--|--|--|--|--|--|--|--|--|--|--|--|--|--|--|--|--|--|--|--|--|--|--|--|--|--|--|--|--|--|--|--|--|--|--|--|--|--|--|--|--|--|--|--|--|--|--|--|--|--|--|--|--|--|--|--|--|--|--|--|--|--|--|--|--|--|--|--|--|--|--|--|--|--|--|--|--|--|--|--|--|--|--|--|--|--|--|--|--|--|--|--|--|--|--|--|--|--|--|--|--|--|--|--|--|--|--|--|--|--|--|--|--|--|--|--|--|--|--|--|--|--|--|--|--|--|--|--|--|--|--|--|--|--|--|--|--|--|--|--|--|--|--|--|--|--|--|--|--|--|--|--|--|--|--|--|--|--|--|--|--|--|--|--|--|--|--|--|--|--|--|--|--|--|--|--|--|--|--|--|--|

|     |   |    |   |                                                                                                                              |      |   |    |   |                                                                                                                  |     |   |    |   |                                                                                                                                                               |
|-----|---|----|---|------------------------------------------------------------------------------------------------------------------------------|------|---|----|---|------------------------------------------------------------------------------------------------------------------|-----|---|----|---|---------------------------------------------------------------------------------------------------------------------------------------------------------------|
| 8y  | M | SC | Y | oxybutynin, albuterol, cefazolin,<br>dexmedetomidine, midazolam, fentanyl                                                    | 7y6m | M | SC | N | Cefazolin, dexmedetomidine,<br>dexamethasone, fentanyl                                                           | 8y  | M | SC | N | Cefazolin, propofol,<br>dexamethasone,<br>hydromorphone, ondansetron                                                                                          |
| 12y | M | BC | Y | Cefazolin, fentanyl, epinephrine, vasopressin,<br>norepinephrine, midazolam                                                  |      |   |    |   |                                                                                                                  | 12y | M | PF | N | amitriptyline, Imitrex,<br>naproxen, albuterol,<br>cefuroxime, fentanyl,<br>lidocaine, propofol,<br>dexamethasone, ondansetron,<br>dexmedetomidine, midazolam |
| 9y  | M | BC | Y | Cefazolin, ketamine, fentanyl, morphine,<br>ondansetron, rocuronium, propofol, propranolol,<br>promethazine, dexmedetomidine |      |   |    |   |                                                                                                                  | 9y  | M | PF | N | Cefazolin, propofol,<br>rocuronium, fentanyl,<br>ondansetron,<br>dexmedetomidine, midazolam                                                                   |
| 5y  | M | BC | Y | Cefazolin, ketamine fentanyl, propofol,<br>ondansetron, rocuronium                                                           | 5y   | F | PF | Y | levetiracetam, cefazolin, fentanyl,<br>dexmedetomidine, dexamethasone,<br>morphine sulfate, midazolam, albuterol |     |   |    |   |                                                                                                                                                               |

Abbreviation: BC: Brain Cortex; BS: Brain Stem; BV: Brain Ventricle; PF: Brain Posterior Fossa; MVI: multivitamin; OCP: Oral Contraception Pills; SC: Spinal Cord; TPN: Total Parental Nutrition
