# Supplementary material for: Central Nervous System Metabolism in Autism, Epilepsy and Developmental Delays: A Cerebrospinal Fluid Analysis
Source: MDPI journal article supplement (doi:10.3390/metabo12050371), 2022-04-20
Supplement: s1 [file s1]

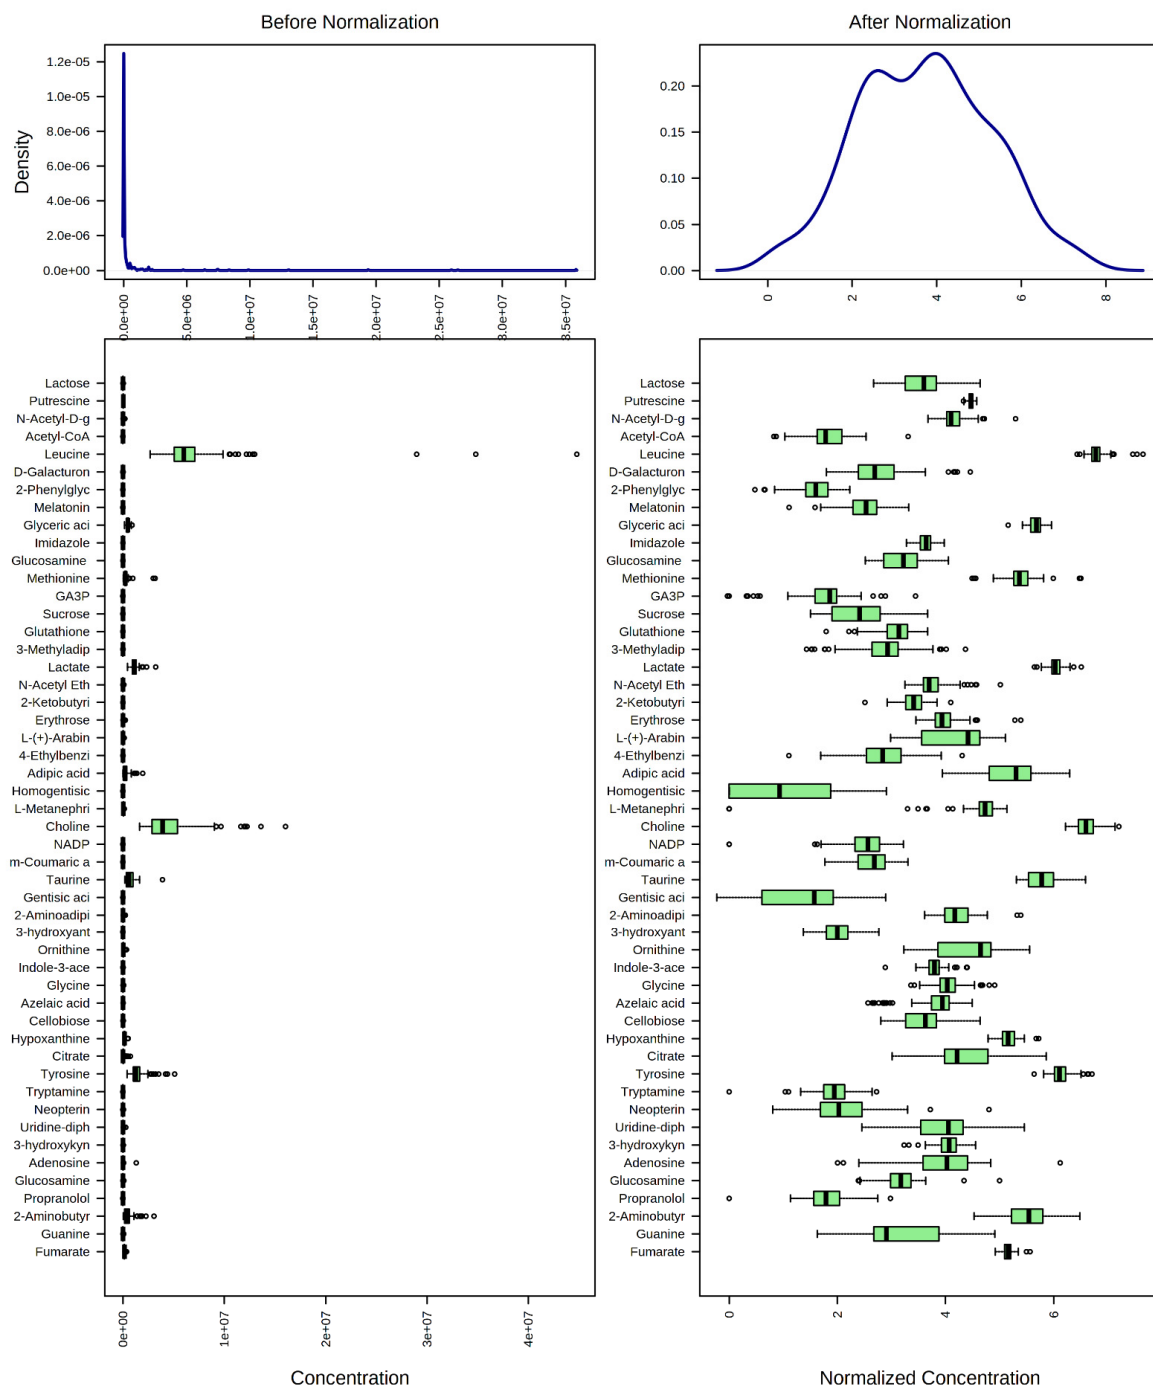

**Figure S1. Data Normalization for Individual Features.**

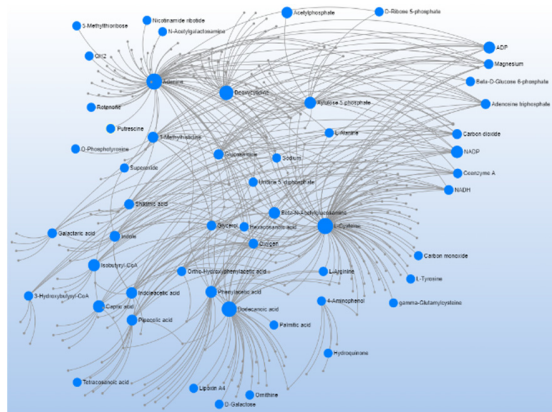

(A) ASD

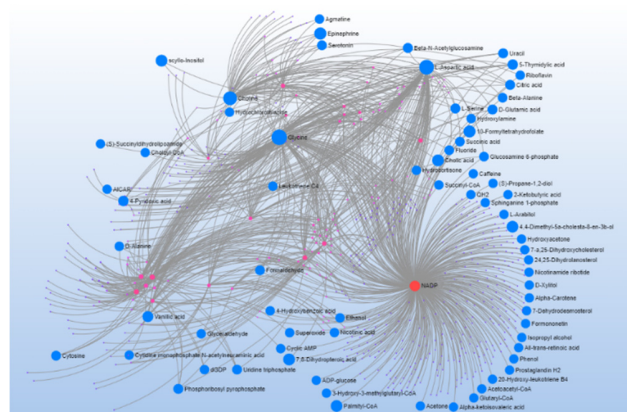

(B) EPI

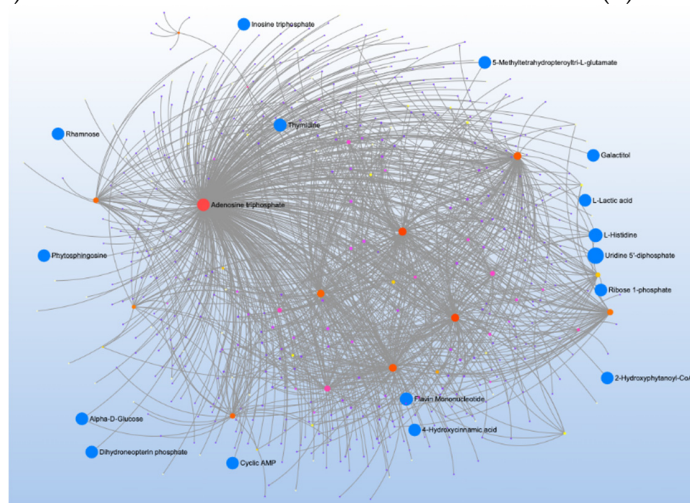

(C) DD

**Figure S2. Neurotransmitter Pathways for Metabolite-Metabolite Interaction Networks for (a) ASD, (b) Epilepsy and (c) DD.**

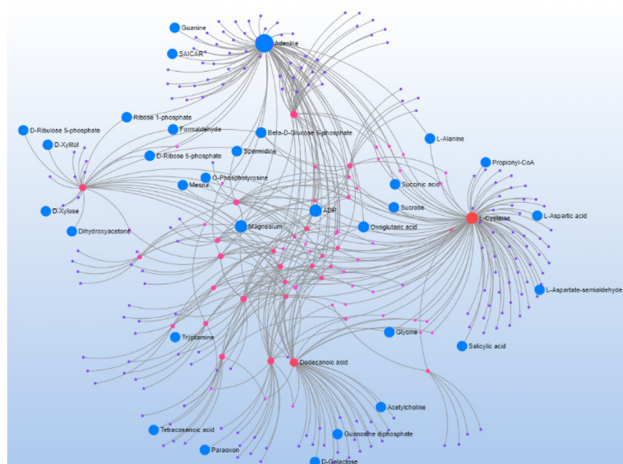

(A) ASD

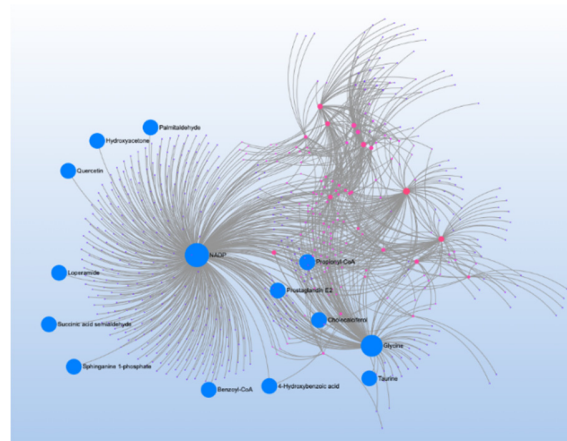

(B) EPI

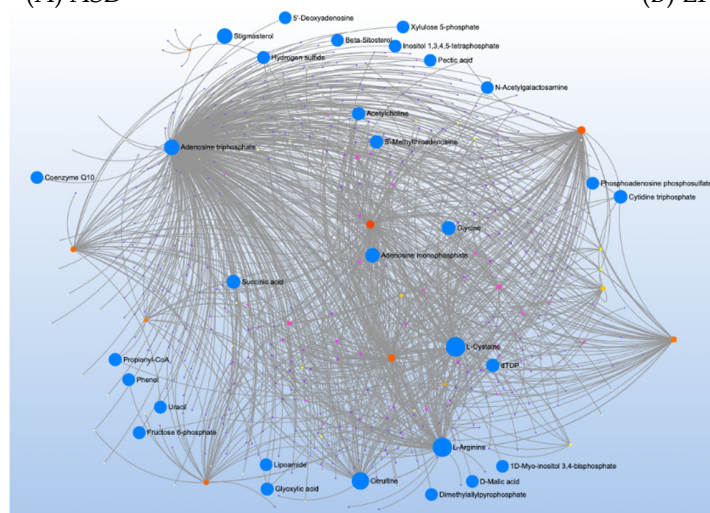

(C) DD

Figure S3. Redox Pathways for Metabolite-Metabolite Interaction Networks for (a) ASD, (b) Epilepsy and (c) DD.

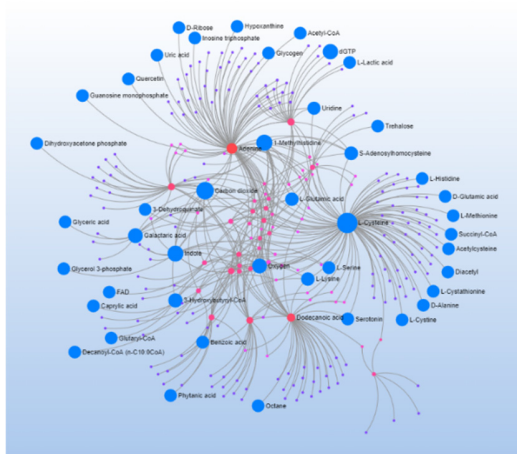

(A) ASD

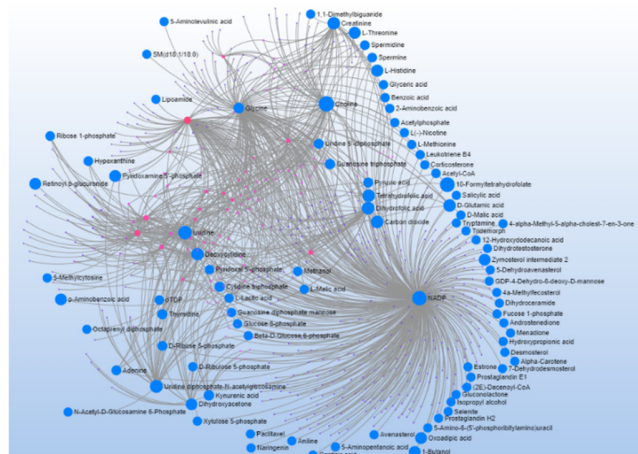

(B) EPI

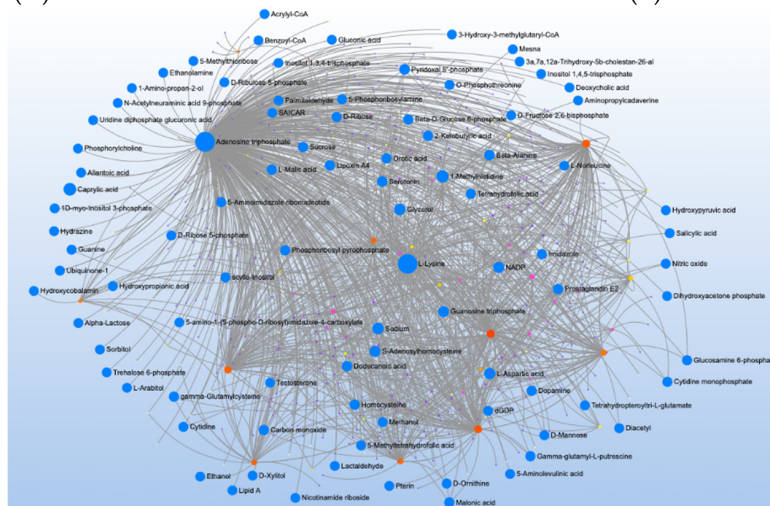

(C) DD

**Figure S4. Nucleotide Pathways for Metabolite-Metabolite Interaction Networks for (a) ASD, (b) Epilepsy and (c) DD.**



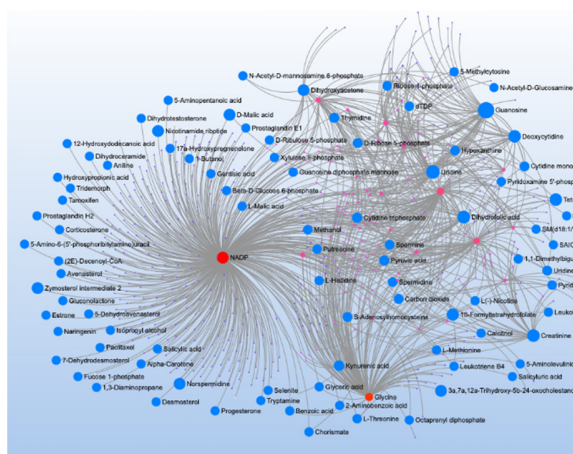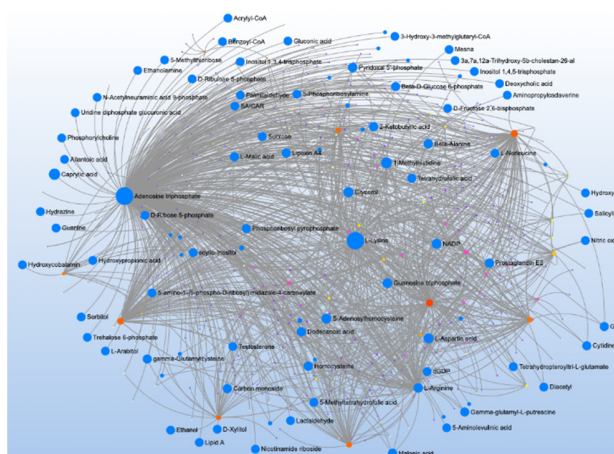

**Figure S5. One-Carbon Metabolism Pathways for Metabolite-Metabolite Interaction Networks for (a) Epilepsy and (b) DD.**

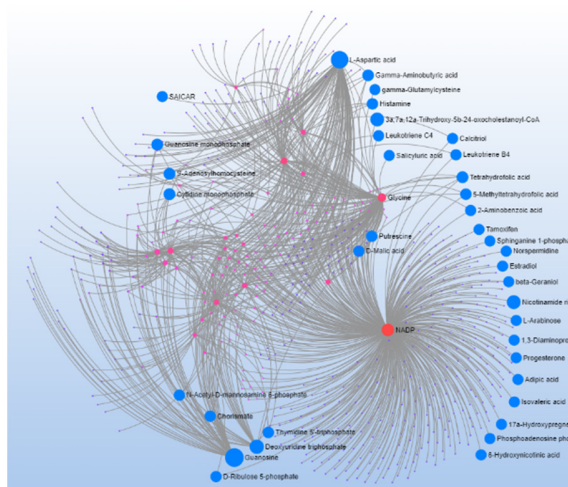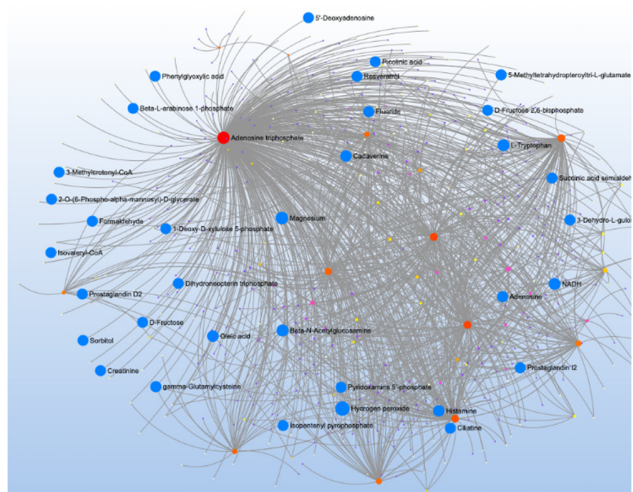

(A) EPI (B) DD

**Figure S6. Vitamin Pathways for Metabolite-Metabolite Interaction Networks for (a) Epilepsy and (b) DD.**

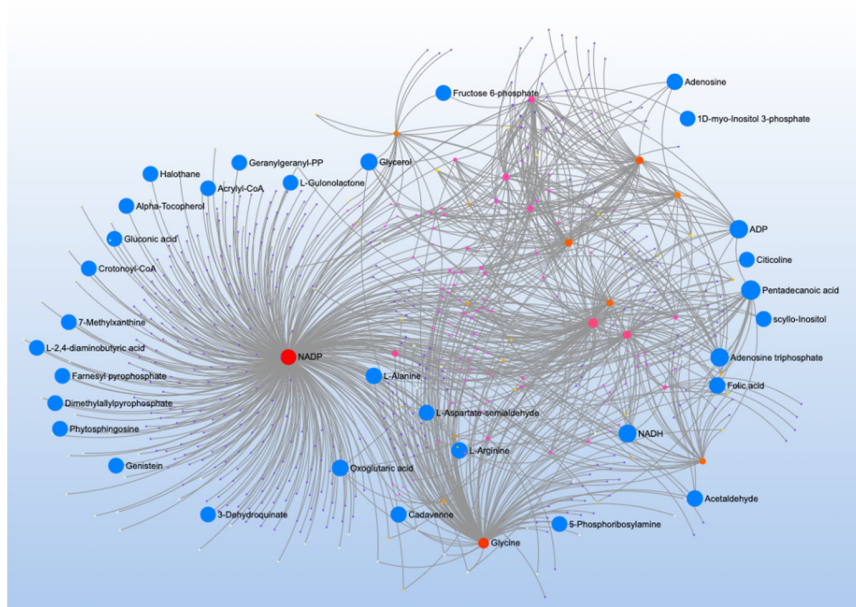

(A) EPI

Figure S7. Lipid Pathways for Metabolite-Metabolite Interaction Networks for (b) Epilepsy.
