# Supplementary material for: Central Nervous System Metabolism in Autism, Epilepsy and Developmental Delays: A Cerebrospinal Fluid Analysis
Source: MDPI journal article supplement (doi:10.3390/metabo12050371), 2022-04-20
Supplement: s1 [file s1]

| ASD                        |         |          |             | Epilepsy                                |         |          |             | Developmental Delay      |         |          |             |
|----------------------------|---------|----------|-------------|-----------------------------------------|---------|----------|-------------|--------------------------|---------|----------|-------------|
| Metabolite                 | t value | p value  | Fold Change | Metabolite                              | t value | p value  | Fold Change | Metabolite               | t value | p value  | Fold Change |
| Isobutyryl-CoA             | 6.86    | 1.01E-09 | 2.1         | Cytidine                                | 3.79    | 0.000282 | 1.5         | Isobutyryl-CoA           | -3.35   | 0.001214 | 0.7         |
| 3-Hydroxybutyryl-CoA       | 4.11    | 8.89E-05 | 1.2         | Acetylglucosamine                       | 3.53    | 0.00066  | 1.2         | Cystamine                | 3.16    | 0.002151 | 1.8         |
| Lauric acid                | 3.49    | 0.000766 | 1.2         | Deoxycytidine                           | 3.14    | 0.002326 | 1.5         | Methylmalonic acid       | 2.96    | 0.004026 | 1.3         |
| Shikimic acid              | 3.39    | 0.001062 | 2.2         | cis-cis-Muconic acid                    | 2.95    | 0.004129 | 1.7         | ATP                      | 2.80    | 0.006268 | 1.4         |
| Cysteine                   | 3.13    | 0.002388 | 1.7         | Guanosine                               | 2.92    | 0.00442  | 1.5         | 4-Aminophenol            | 2.74    | 0.007554 | 1.3         |
| 4-Aminophenol              | -2.96   | 0.003976 | 0.7         | N-Acetyl-D-galactosamine                | 2.81    | 0.006052 | 1.2         | Cysteine                 | -2.66   | 0.009229 | 0.6         |
| Deoxycytidine              | -2.87   | 0.005222 | 0.7         | Choline                                 | 2.79    | 0.006572 | 1.2         | 1-Methylhistidine        | -2.52   | 0.013465 | 0.8         |
| Benzoic acid               | 2.83    | 0.005748 | 1.3         | 5-Methylcytidine                        | 2.77    | 0.006872 | 1.3         | DCDP                     | 2.43    | 0.017032 | 1.5         |
| Glucosamine                | 2.69    | 0.008533 | 1.3         | Xanthosine                              | 2.72    | 0.007804 | 1.2         | Stachyose                | -2.39   | 0.018979 | 0.7         |
| N,N-Dicyclohexylurea       | 2.65    | 0.009554 | 1.1         | Phenylbutazone                          | 2.62    | 0.010451 | 1.4         | Cytosine                 | 2.26    | 0.026544 | 1.6         |
| Cystamine                  | -2.62   | 0.010376 | 0.6         | Aspartate                               | 2.59    | 0.011316 | 1.3         | N-Acetyl-D-galactosamine | 2.25    | 0.026811 | 1.1         |
| Adenine                    | 2.46    | 0.016075 | 1.5         | Uridine-diphosphate-N-acetylglucosamine | 2.40    | 0.018345 | 1.5         | Homoserine               | 2.18    | 0.032132 | 1.1         |
| Mucic acid                 | 2.44    | 0.01668  | 1.4         | Glycine                                 | 2.38    | 0.019475 | 1.2         | Arginine                 | 2.18    | 0.032267 | 1.1         |
| GA3P                       | -2.43   | 0.017232 | 0.7         | Gibberellic acid                        | 2.33    | 0.022273 | 1.7         | Citrulline               | 2.16    | 0.033891 | 1.2         |
| 1-Methylhistidine          | 2.40    | 0.018494 | 1.3         | Kynurenic acid                          | 2.32    | 0.022824 | 1.6         | Ornithine                | 2.12    | 0.036705 | 1.4         |
| malonic acid               | 2.36    | 0.020304 | 1.2         | Dihydrofolic acid                       | -2.26   | 0.026578 | 0.8         | Lysine                   | 2.11    | 0.037461 | 1.1         |
| Nonadecanoic acid          | 2.31    | 0.023427 | 1.1         | Pentadecanoic acid                      | 2.21    | 0.029486 | 1.1         | Pyroglutamic acid        | 2.06    | 0.042392 | 1.1         |
| Indole                     | 2.29    | 0.024207 | 1.1         | Dihydroxyacetone                        | 2.19    | 0.031141 | 1.1         | Glutamine                | 2.06    | 0.042703 | 1.1         |
| Capric acid                | 2.29    | 0.024431 | 1.2         | D-Xylonic acid                          | 2.17    | 0.032412 | 1.2         | Asparagine               | 2.04    | 0.044111 | 1.1         |
| Methylguanidine            | -2.23   | 0.028097 | 0.8         | N-Acetylglutamine                       | 2.17    | 0.032699 | 1.2         |                          |         |          |             |
| Phosphocreatine            | 2.15    | 0.034643 | 1.1         | Creatinine                              | 2.11    | 0.037395 | 1.6         |                          |         |          |             |
| Heptadecanoic acid         | 2.09    | 0.039531 | 1.3         | L-Normetanephine                        | 2.08    | 0.040446 | 1.1         |                          |         |          |             |
| 2-Hydroxyphenylacetic acid | 2.08    | 0.040262 | 1.3         | NADP                                    | -2.06   | 0.042911 | 0.8         |                          |         |          |             |
| Fumarate                   | -2.07   | 0.041132 | 0.9         | Uridine                                 | 2.04    | 0.044366 | 1.2         |                          |         |          |             |
| Phenylacetic acid          | -2.06   | 0.042606 | 0.9         | dUTP                                    | -2.04   | 0.044519 | 0.8         |                          |         |          |             |
| D-xylulose 5-phosphate     | 2.06    | 0.042669 | 1.7         | Galactonic acid                         | 2.01    | 0.047895 | 1.2         |                          |         |          |             |
| Indole-3-acetic acid       | 2.04    | 0.044147 | 1.1         | Vanillic acid                           | 2.00    | 0.048703 | 1.4         |                          |         |          |             |
| Pipecolic acid             | 2.01    | 0.048089 | 1.2         | 4-Pyridoxic acid                        | 2.00    | 0.049052 | 1.1         |                          |         |          |             |
