# Supplementary material for: Central Nervous System Metabolism in Autism, Epilepsy and Developmental Delays: A Cerebrospinal Fluid Analysis
Source: Metabolites. 2022 Apr 20;12(5):371. doi: 10.3390/metabo12050371 (PMC9148155; doi:10.3390/metabo12050371)
Supplement: Supplementary file 1 [file metabolites-12-00371-s001.zip]

Archive with 4 entries (4 files):
- Supplementary Figures.pdf
- Supplementary Table S1.pdf
- Supplementary Table S2.pdf
- Supplementary Table S3.pdf
